# Supplementary material for: On the structure and dynamics of the hydrated sulfite ion in aqueous solution – an ab initio QMCF MD simulation and large angle X-ray scattering study
Source: Royal Society of Chemistry journal article supplement (doi:10.1039/c2dt12467j), 2012-01-01
Supplement: c2dt12467j.pdf [file c2dt12467j.pdf]

# **On the Structure and Dynamics of the Asymmetrically Hydrated Sulfite Ion in Aqueous Solution – An ab initio QMCF MD Simulation and Large Angle X-ray Scattering Study**

Lars Eklund,<sup>a</sup> Tomas S. Hofer,<sup>b</sup> Andreas B. Pribil,<sup>b</sup> Bernd M. Rode<sup>b</sup> and Ingmar Persson<sup>a\*</sup>

<sup>a</sup> Department of Chemistry, Swedish University of Agricultural Sciences, P.O.Box 7015, SE-750 07 Uppsala, Sweden.

<sup>b</sup> Theoretical Chemistry Division, Institute of General, Inorganic and Theoretical Chemistry, University of Innsbruck, Innrain 52a, A-6020 Innsbruck, Austria,

**Supporting Material**

Complete reference 16

- (16) M. J. Frisch, G. W. Trucks, H. B. Schlegel, G. E. Scuseria, M. A. Robb, J. R. Cheeseman, J. Montgomery, T. Vreven, K. N. Kudin, J. C. Burant, J. M. Millam, S. S. Iyengar, J. Tomasi, V. Barone, B. Mennucci, M. Cossi, G. Scalmani, N. Rega, G. A. Petersson, H. Nakatsuji, M. Hada, M. Ehara, K. Toyota, R. Fukuda, J. Hasegawa, M. Ishida, T. Nakajima, Y. Honda, O. Kitao, H. Nakai, M. Klene, X. Li, J. E. Knox, H. P. Hratchian, J. B. Cross, V. Bakken, C. Adamo, J. Jaramillo, R. Gomperts, R. E. Stratmann, O. Yazyev, A. J. Austin, R. Cammi, C. Pomelli, J. W. Ochterski, P. Y. Ayala, K. Morokuma, G. A. Voth, P. Salvador, J. J. Dannenberg, V. G. Zakrzewski, S. Dapprich, A. D. Daniels, M. C. Strain, O. Farkas, D. K. Malick, A. D. Rabuck, K. Raghavachari, J. B. Foresman, J. V. Ortiz, Q. Cui, A. G. Baboul, S. Clifford, J. Cioslowski, B. B. Stefanov, G. Liu, A. Liashenko, P. Piskorz, I. Komaromi, R. L. Martin, D. J. Fox, T. Keith, M. A. Al-Laham, C. Y. Peng, A. Nanayakkara, M. Challacombe, P. M. W. Gill, B. Johnson, W. Chen, M. W. Wong, C. Gonzalez and J. A. Pople, *Gaussian 03, Revision E.01*.

**Table S1.** Summary of solid state structures containing individual sulfite ions where the counter ion is monovalent or has a complete hydration shell.

| ICSD code | <i>d</i> (S-O) | Reference                                                                                                                                                                                   |
|-----------|----------------|---------------------------------------------------------------------------------------------------------------------------------------------------------------------------------------------|
| 4432      | 1.505 Å        | Larsson, L. O.; Kierkegaard, P. <i>Acta Chem. Scand.</i> <b>1969</b> , <i>23</i> , 2253-2260; <i>Powder Diffraction</i> <b>1986</b> , <i>1</i> , 265-275. Na <sub>2</sub> SO <sub>3</sub> . |
| 1626      | 1.508 Å        | Oddon, Y.; Pepe, G.; Tranquard, A. <i>J. Chem. Res. S</i> <b>1977</b> , <i>1977</i> , 138-139. NaTi <sub>3</sub> (SO <sub>3</sub> ) <sub>2</sub> .                                          |
| 60762     | 1.515 Å        | Andersen, L.; Strömberg, D. <i>Acta Chem. Scand., Ser. A</i> <b>1986</b> , <i>40</i> , 479-480. K <sub>2</sub> SO <sub>3</sub>                                                              |
| 23824     | 1.524 Å        | Battelle, L. F.; Trueblood, K. N. <i>Acta Crystallogr.</i> <b>1965</b> , <i>19</i> , 531-535. (NH <sub>4</sub> ) <sub>2</sub> SO <sub>3</sub> ·H <sub>2</sub> O                             |

**Mean 1.513 Å/4**

| ICSD code | <i>d</i> (S-O) | <i>d</i> (S···H) | Reference                                                                                                                                                      |
|-----------|----------------|------------------|----------------------------------------------------------------------------------------------------------------------------------------------------------------|
| 48112     | 1.528 Å        | 2.800 Å          | Andersen, L.; Lindqvist, O. <i>Acta Crystallogr., Sect. B</i> <b>1984</b> , <i>40</i> , 584-586. [Mg(H <sub>2</sub> O) <sub>6</sub> ]SO <sub>3</sub> .         |
| 26149     | 1.532 Å        | 2.789 Å          | Baggio, S.; Becka, L. N. <i>Acta Crystallogr., Sect. B</i> <b>1969</b> , <i>25</i> , 1150-1155. . [Ni(H <sub>2</sub> O) <sub>6</sub> ]SO <sub>3</sub> .        |
| 62636     | 1.533 Å        | 2.782 Å          | Bats, J. W.; Fuess, H.; Elerman, Y. <i>Acta Crystallogr., Sect. B</i> <b>1986</b> , <i>42</i> , 552-557. [Mg(H <sub>2</sub> O) <sub>6</sub> ]SO <sub>3</sub> . |
| 2524      | 1.536 Å        |                  | Flack, H. D. <i>Acta Crystallogr., Sect. B</i> <b>1973</b> , <i>29</i> , 656-658. [Mg(H <sub>2</sub> O) <sub>6</sub> ]SO <sub>3</sub> .                        |
| 62637     | 1.536 Å        |                  | Bats, J. W.; Fuess, H.; Elerman, Y. <i>Acta Crystallogr., Sect. B</i> <b>1986</b> , <i>42</i> , 552-557. [Mg(H <sub>2</sub> O) <sub>6</sub> ]SO <sub>3</sub> . |
| 62638     | 1.536 Å        |                  | Bats, J. W.; Fuess, H.; Elerman, Y. <i>Acta Crystallogr., Sect. B</i> <b>1986</b> , <i>42</i> , 552-557. [Mg(H <sub>2</sub> O) <sub>6</sub> ]SO <sub>3</sub> . |

**Mean 1.534 Å/6**

**Table S2.** Numeric values of the peaks in Figure 2.

**Figure 2a**

| <b>Center</b> | <b>FWHM</b> |
|---------------|-------------|
| 1.0           | 0.058       |
| 1.5           | 0.074       |
| 1.9           | 0.427       |
| 2.8           | 0.324       |
| 3.1           | 0.346       |
| 3.7           | 0.823       |
| 4.3           | 2.011       |

**Figure 2b**

| <b>Center</b> | <b>FWHM</b> |
|---------------|-------------|
| 2.792         | 0.372       |
| 2.994         | 0.620       |
| 4.196         | 1.435       |

**Figure 2c**

| <b>Center</b> | <b>FWHM</b> |
|---------------|-------------|
| 0.975         | 0.058       |
| 1.921         | 0.418       |

**Figure 2d**

| <b>Center</b> | <b>FWHM</b> |
|---------------|-------------|
| 1.526         | 0.075       |
| 3.725         | 0.530       |
| 4.114         | 0.370       |

**Figure 2e**

| <b>Center</b> | <b>FWHM</b> |
|---------------|-------------|
| 2.827         | 0.330       |
| 4.368         | 2.047       |
